# Supplementary material for: First complete genome sequence and comparative analysis of Salmonella enterica subsp. diarizonae serovar 61:k:1,5,(7) indicates host adaptation traits to sheep
Source: PubMed Central journal article supplement (PMC6791114; doi:10.1186/s13099-019-0330-9), 2019-10-14

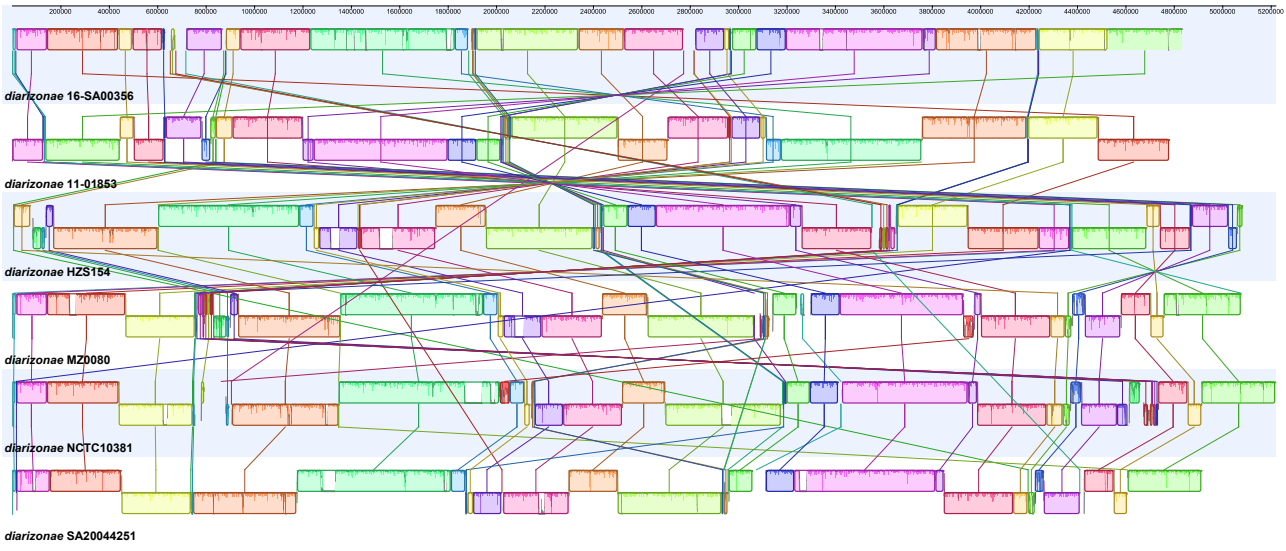

Supplement: 13099_2019_330_MOESM3_ESM.pdf [file 13099_2019_330_MOESM3_ESM.pdf]
